# Supplementary material for: Identifying Themes and Patterns on Management of Horticultural Innovations with an Automated Text Analysis
Source: MDPI journal article supplement (doi:10.3390/agronomy11061103), 2021-05-28

**Table S1.** Overview of selected papers.

| Authors                                                                            | Journal                                                          | Title                                                                                                              | Year |
|------------------------------------------------------------------------------------|------------------------------------------------------------------|--------------------------------------------------------------------------------------------------------------------|------|
| Orsini, F.; Kahane, R.; Nono-Womdim, R.; Gianquinto, G.                            | Agronomy for Sustainable Development                             | Urban agriculture in the developing world: A review                                                                | 2013 |
| Sotamenou, J.; Parrot, L.                                                          | International Journal of Agricultural Sustainability             | Sustainable urban agriculture and the adoption of composts in Cameroon                                             | 2013 |
| Wilson, A. D.                                                                      | Sensors                                                          | Diverse Applications of Electronic-Nose Technologies in Agriculture and Forestry                                   | 2013 |
| Yaghoubi, S.; Akbarzadeh, N.A.; Bazargani, Shadi.S.; Bazargani, Sama.S.; Asl, M.I. | International Journal of Mechanical and Mechatronics Engineering | Autonomous robots for agricultural tasks and farm assignment and future trends in agro robots                      | 2013 |
| Gilioli, G.; Tikubet, G.; Herren, H.R.; Baumgärtner, J.                            | International Journal of Agricultural Sustainability             | Assessment of social–ecological transitions in a peri-urban Ethiopian farming community                            | 2015 |
| Osano, H.M.; Koine, P.W.                                                           | Journal of Innovation and Entrepreneurship                       | Role of foreign direct investment on technology transfer and economic growth in Kenya: a case of the energy sector | 2015 |
| Trentacoste, E.R.; Connor, D.J.; Gómez-del-Campo, M.                               | Scientia Horticulturae                                           | Row orientation: Applications to productivity and design of hedgerows in horticultural and olive orchards          | 2015 |

|                                                   |                                       |                                                                                                                                                                                          |      |
|---------------------------------------------------|---------------------------------------|------------------------------------------------------------------------------------------------------------------------------------------------------------------------------------------|------|
| Vänninen, I.; Pereira-Querol, M.; Engeström, Y.   | Agricultural Systems                  | Generating transformative agency among horticultural producers: An activity-theoretical approach to transforming Integrated Pest Management                                              | 2015 |
| Dennis, M.; Armitage, R.P.; James, P.             | Urban Forestry & Urban Greening       | Appraisal of social-ecological innovation as an adaptive response by stakeholders to local conditions: Mapping stakeholder involvement in horticulture orientated green space management | 2016 |
| Mankad, A.                                        | Agronomy for Sustainable Development  | Psychological influences on biosecurity control and farmer decision-making. A review                                                                                                     | 2016 |
| Rickard, B.J.; Richards, T.J.; Yan, J.            | Agricultural Economics                | University licensing of patents for varietal innovations in agriculture                                                                                                                  | 2016 |
| Buurma, J.S.; van der Velden, N.J.A.              | Crop Protection                       | New approach to Integrated Pest Management research with and for horticulture. A vision from and beyond economics                                                                        | 2017 |
| Juntti, M.; Downward, S.D.                        | Land Use Policy                       | Interrogating sustainable productivism: Lessons from the 'Almerian miracle'                                                                                                              | 2017 |
| Kruger, H.                                        | NJAS - Wageningen Journal of Sciences | Helping local industries help themselves in a multi-level biosecurity world – Dealing with the impact of horticultural pests in the trade arena                                          | 2017 |
| Kruger, H.                                        | Agricultural Systems                  | Creating an enabling environment for industry-driven pest suppression: The case of suppressing Queensland fruit fly through area-wide management                                         | 2017 |
| Mankad, A.; Loechel, B.; Measham, P.F.            | Agronomy for Sustainable Development  | Psychosocial barriers and facilitators for area-wide management of fruit fly in southeastern Australia                                                                                   | 2017 |
| Amos, C.C.; Rahman, A.; Karim, F.; Gathenya, J.M. | Journal of Cleaner Production         | A scoping review of roof harvested rainwater usage in urban agriculture: Australia and Kenya in focus                                                                                    | 2018 |

|                                                                                           |                                                                          |                                                                                                                                                   |      |
|-------------------------------------------------------------------------------------------|--------------------------------------------------------------------------|---------------------------------------------------------------------------------------------------------------------------------------------------|------|
| García-Caparrós, P.; Llanderal, A.; Maksimovic, I.; Lao, M.T.                             | Water                                                                    | Cascade Cropping System with Horticultural and Ornamental Plants under Greenhouse Conditions                                                      | 2018 |
| Acuña, T.B.; Monckton, D.; Boersma, M.; Bailey, A.; Gracie, A.                            | International Journal of Innovation in Science and Mathematics Education | Design and Delivery of a Masterclass in Horticultural Business                                                                                    | 2019 |
| Deligios, P.A.; Chergia, A.P.; Sanna, G.; Solinas, S.; Todde, G.; Narvarte, L.; Ledda, L. | Science of The Total Environment                                         | Climate change adaptation and water saving by innovative irrigation management applied on open field globe artichoke                              | 2019 |
| Eriksson, T.; Halla, H.; Heikkilä, M.; Kalliomäki, H.                                     | Agricultural and Food Sciences                                           | Bridging entrepreneurial competencies and business model innovation: insights on business renewal in the small horticulture businesses in Finland | 2019 |
| Gruda, N.; Bisbis, M.; Tanny, J.                                                          | Journal of Cleaner Production                                            | Influence of climate change on protected cultivation: Impacts and sustainable adaptation strategies - A review                                    | 2019 |
| Menary, J.; Collier, R.; Seers, K.                                                        | Agricultural Systems                                                     | Innovation in the UK fresh produce sector: Identifying systemic problems and the move towards systemic facilitation                               | 2019 |
| Oberoi, H.S.; Dinesh, M.R.                                                                | Journal of Horticultural Sciences                                        | Trends and Innovations in Value Chain Management of Tropical Fruits                                                                               | 2019 |
| Rathore, V.S.; Tanwar, S.P.S.; Kumar, P.; Yadav, O.P.                                     | India Journal of Agricultural Sciences                                   | Integrated Farming System: Key to sustainability in arid and semi-arid regions                                                                    | 2019 |
| Sanyé-Mengual, E.; Specht, K.; Grapsa, E.; Orsini, F.; Gianquinto, G                      | Sustainability                                                           | How can innovation in urban agriculture contribute to sustainability? A characterization and evaluation study from five Western European cities   | 2019 |

|                                                                                              |                                  |                                                                                                                                                                                                                              |      |
|----------------------------------------------------------------------------------------------|----------------------------------|------------------------------------------------------------------------------------------------------------------------------------------------------------------------------------------------------------------------------|------|
| Csortan, G.; Ward, J.; Roetman, P.                                                           | PLoS ONE                         | Productivity, resource efficiency and financial savings: An investigation of the current capabilities and potential of South Australian home food gardens                                                                    | 2020 |
| De Corato, U.                                                                                | Science of The Total Environment | Agricultural waste recycling in horticultural intensive farming systems by on-farm composting and compost-based tea application improves soil quality and plant health: A review under the perspective of a circular economy | 2020 |
| Deffontaines, L.; Mottes, C.; Della Rossa, P.; Lesueur-Jannoyer, M.; Cattan, P.; Le Bail, M. | Agricultural Systems             | How farmers learn to change their weed management practices: Simple changes lead to system redesign in the French West Indies                                                                                                | 2020 |
| Dupré, M.; Michels, T.; Le Gal, P.-Y.                                                        | European Journal of Agronomy     | Crop drivers in the shift from synthetic inputs to alternative practices in diversified farming systems                                                                                                                      | 2020 |
| Ng'atigwa, A.A.; Hepelwa, A.; Yami, M.; Manyong, V.                                          | Agriculture                      | Assessment of Factors Influencing Youth Involvement in Horticulture Agribusiness in Tanzania: A Case Study of Njombe Region                                                                                                  | 2020 |
| Nicola S.; Pignata G.; Ferrante A.; Bulgari R.; Cocetta G.; Ertani A.                        | AgroLife Scientific Journal      | Water Use Efficiency in Greenhouse Systems and its Application in Horticulture                                                                                                                                               | 2020 |

**Table S2.** Overview of selected papers per subject area category.

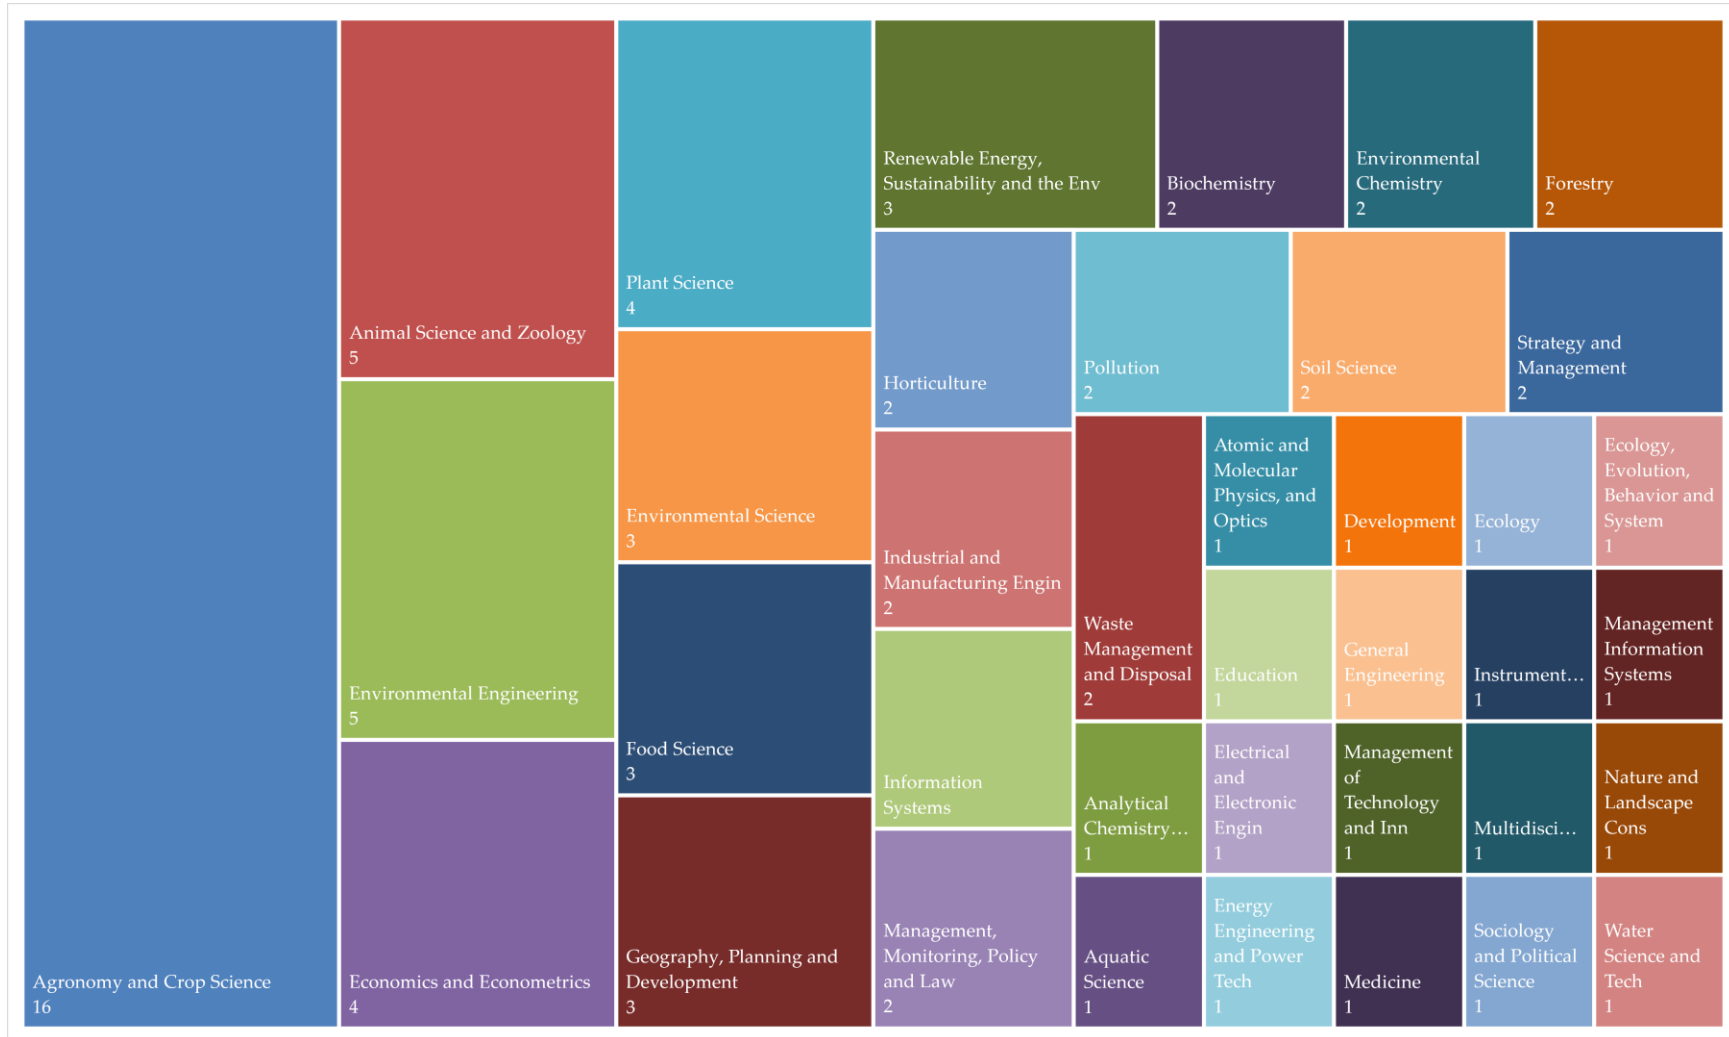

Supplement: s1 [file s1]
