# Supplementary material for: Identifying Themes and Patterns on Management of Horticultural Innovations with an Automated Text Analysis
Source: MDPI journal article supplement (doi:10.3390/agronomy11061103), 2021-05-28
Supplement: s1 [file s1]

Archive with 1 entries (1 files):
- agronomy-1160494-supplementary.pdf
